# Supplementary material for: Exosomes Derived from Bone Marrow Mesenchymal Stem Cells Alleviate Histological Damage and Modulate ADAM12 Gene Expression in the Type 2 Diabetic Rat Model of Achilles Tendinopathy
Source: Research Square preprint supplement (doi:10.21203/rs.3.rs-5955380/v1), 2025-02-06
Supplement: Supplementary file 1 [file b37cb8e58573028a8686d1c9.docx]

Supplementary Materials

**Exosomes Derived from Bone Marrow Mesenchymal Stem Cells Alleviate Histological Damage and Modulate *ADAM12* Gene Expression in the Type 2 Diabetic Rat Model of Achilles Tendinopathy**

Daffa Raditya Fernanda1, Radiana Dhewayani Antarianto2,3, Fadhillah1,4, Upi Chairun Nisa1,5, Abinawanto1,4, Retno Lestari1,4*

1 Department of Biology, Faculty of Mathematics and Natural Sciences, Universitas Indonesia, West Java, 16424, Indonesia

2 Department of Histology, Faculty of Medicine, Universitas Indonesia, Jakarta, 10430, Indonesia

3 Stem Cell and Tissue Engineering Research Cluster, Indonesian Medical Education and Research Institute (IMERI), Jakarta, 10430, Indonesia

4 Cellular Molecular Mechanisms in Biological System (CEMBIOS) Research Group, Faculty of Mathematics and Natural Sciences, Universitas Indonesia, West Java, 16424, Indonesia

5 Metabolomics and Chemical Ecology (MeCE) Research Group, Faculty of Mathematics and Natural Sciences, Universitas Indonesia, West Java, 16424, Indonesia

*Corresponding author. E-mail address: [retno.lestari@sci.ui.ac.id](mailto:retno.lestari@sci.ui.ac.id)

**Supplementary Table 1.** Microbial detection in BM-MSC-Exos using a respiratory flow chip kit.

| **Molecular Detection** | **Pathogen Type** | **Result** |
| --- | --- | --- |
| Virus Influenza A H1N1 2009 | Virus | Negative |
| Human Metapneumovirus | Virus | Negative |
| Human Parainfluenza Virus Type 3 | Virus | Negative |
| Rhinovirus | Virus | Negative |
| rPCR Mycoplasma pneumonia | Bacteria | Negative |
| Virus Influenza Type A | Virus | Negative |
| Virus Influenza Type B | Virus | Negative |
| *Bordetella pertussis* | Bacteria | Negative |
| *Human coronavirus 229E* | Virus | Negative |
| Virus Influenza A H3 | Virus | Negative |
| Respiratory Syncytial Virus Type B | Virus | Negative |
| Human Parainfluenza Virus Type 1 | Virus | Negative |
| Human Parainfluenza Virus Type 2 | Virus | Negative |
| Human Parainfluenza Virus Type 4 | Virus | Negative |
| *Adenovirus* | Virus | Negative |
| *Bocavirus* | Virus | Negative |
| *Human coronavirus HKU1* | Virus | Negative |
| *Human coronavirus NL63* | Virus | Negative |
| Human Coronavirus OC43 | Virus | Negative |
| *Bordetella parapertusis* | Bacteria | Negative |
| *Enterovirus* | Virus | Negative |
| Human Coronavirus SARS CoV-2 | Virus | Negative |
| Respiratory Syncytial Virus Type A | Virus | Negative |

**Supplementary Table 2.** Bonar Score Evaluation.

| **Parameter** | **Mean Score** | | ***P*** |
| --- | --- | --- | --- |
| **Control Group**  (*n* = 6) | **Exosome Group**  (*n* = 6) |
| Tenocyte | 1,37 ± 0.975 | 0,23 ± 0.368 | 0.022* |
| Collagen Fibers | 1,23 ± 0.753 | 0,40 ± 0.506 | 0.074 |
| Vascularization | 1,50 ± 1.225 | 0,00 ± 0.000 | 0.061 |
| Cellularity | 0,63 ± 0.843 | 0,37 ± 0.463 | 0.913 |
| Ground Substance | 1,67 ± 1.041 | 0,67 ± 0.532 | 0.123 |

Data are represented as mean ± SD, * indicate *P* < 0.05.
